# Supplementary material
Source: ML conference proceedings conference paper supplement (https://proceedings.neurips.cc/paper_files/paper/2007/hash/c06d06da9666a219db15cf575aff2824-Abstract.html)

# Iterative Nonlinear Dimensionality Reduction By Manifold Sculpting

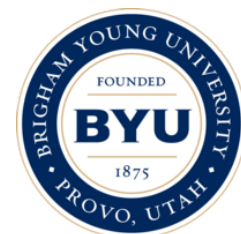

Mike Gashler, Dan Ventura, and Tony Martinez

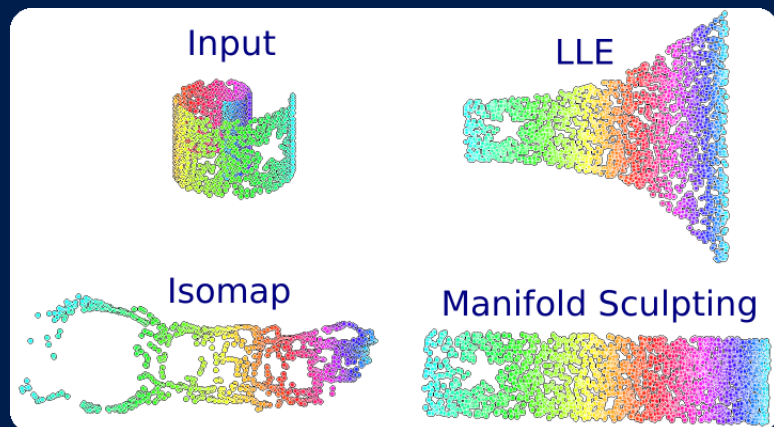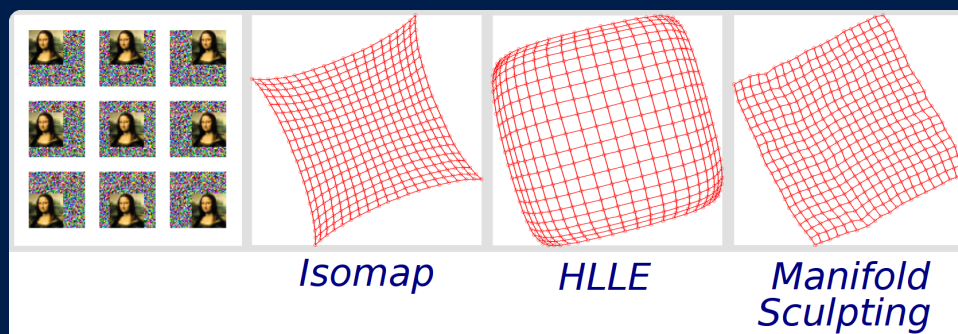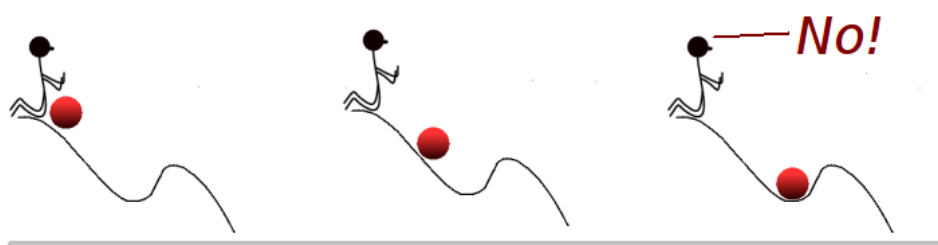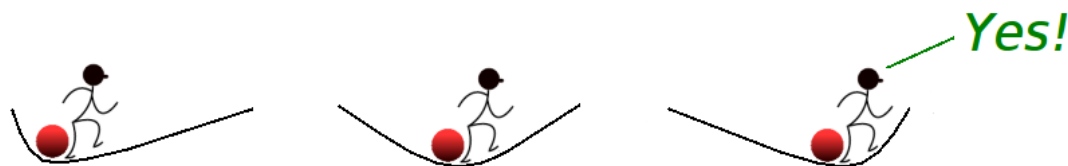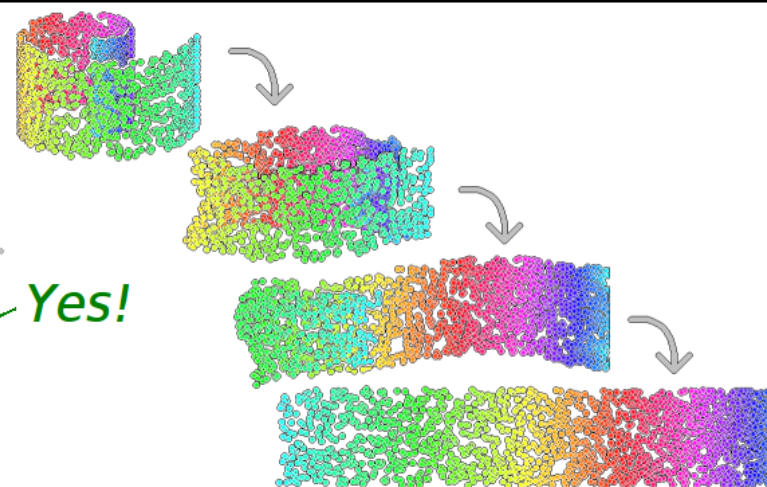

Supplement: Supplementary file 2 [file c06d06da9666a219db15cf575aff2824-Supplemental.zip]
